# Supplementary material for: Novel bacterial group potentially dominates sulfur cycling in the dark ocean
Source: Research Square preprint supplement (doi:10.21203/rs.3.rs-1561045/v1), 2022-04-20
Supplement: Supplementary file 2 [file 8b9d5cf3d8e3c300c982b4ab.xlsx]

## Sheet: mitag.UBA10353.coord
Suppl. Table 2. Relative abundance to the total prokaryotic community in the global ocean of the former UBA10353 and now UBA868. Data derived from Tara Oceans and Malaspina expeditions. See Material and Methods for details
Sample_name	Longtitude	Latitude	SampleType	Bacteria;Proteobacteria;Gammaproteobacteria;UBA10353 marine group;uncultured bacterium	Bacteria;Proteobacteria;Gammaproteobacteria;UBA10353 marine group;marine metagenome	Bacteria;Proteobacteria;Gammaproteobacteria;UBA10353 marine group;uncultured gamma proteobacterium	Bacteria;Proteobacteria;Gammaproteobacteria;UBA10353 marine group;uncultured organism	Bacteria;Proteobacteria;Gammaproteobacteria;UBA10353 marine group;Gammaproteobacteria bacterium LS_SOB	Bacteria;Proteobacteria;Gammaproteobacteria;UBA10353 marine group;hydrothermal vent metagenome	Bacteria;Proteobacteria;Gammaproteobacteria;UBA10353 marine group;uncultured bacterium KM3-174-C5	Bacteria;Proteobacteria;Gammaproteobacteria;UBA10353 marine group;uncultured bacterium HERMI11	Bacteria;Proteobacteria;Gammaproteobacteria;UBA10353 marine group;uncultured gamma proteobacterium HF0200_24F15	Bacteria;Proteobacteria;Gammaproteobacteria;UBA10353 marine group;uncultured marine microorganism	Bacteria;Proteobacteria;Gammaproteobacteria;UBA10353 marine group;uncultured proteobacterium	Bacteria;Proteobacteria;Gammaproteobacteria;UBA10353 marine group;unidentified marine bacterioplankton	UBA10353 (now UBA868) marine group
TARA_137_DCM_0.22.3	-116.647	14.2075	Epi	0.551429	0.148933	1.74761	0.356308	0	0.0471307	0.51938	0	0	0.0669256	0.0263932	0.0207375	3.48484
TARA_039_MES_0.22.1.6	66.622	18.5918	Meso	0.518167	0.155923	2.33097	0.0251996	0.00787488	0.0456743	0.105523	0	0	0.0566992	0.215772	0	3.4618
MSP_1	2.448	40.832	Bathy	2.11931	0	0	0	0	0	1.0989	0	0	0	0	0	3.21821
TARA_038_MES_0.22.1.6	64.4913	19.0393	Meso	0.576552	0.152617	1.93527	0	0	0.0572313	0.13354	0	0	0.0699493	0.180173	0	3.10533
TARA_100_MES_0.22.3	-95.9759	-13.0023	Meso	0.730507	0.129825	1.14517	0.298403	0	0.0377848	0.570648	0	0	0.061037	0.0271276	0.0271276	3.02763
TARA_137_MES_0.22.3	-116.643	14.2025	Meso	0.486672	0.187822	1.04181	0.384897	0	0.0647662	0.692074	0	0	0.0814204	0.00647662	0	2.94594
TARA_098_MES_0.22.3	-111.691	-25.8076	Meso	1.51725	0.0920555	0.0809645	0	0	0.164147	0.584497	0	0.022182	0.205184	0	0	2.66628
TARA_138_MES_0.22.3	-103.06	6.3559	Meso	0.448169	0.16349	0.937496	0.33384	0	0.0445882	0.612803	0	0	0.0857466	0	0.00914631	2.63528
TARA_146_MES_0.22.3	-71.2907	34.6663	Meso	1.14304	0.0831298	0.176651	0.0155868	0	0.120798	0.785837	0	0.0181847	0.218216	0.0207825	0	2.58222
TARA_078_MES_0.22.3	-43.2705	-30.1484	Meso	1.4137	0.0921979	0.0320688	0.0227154	0	0.203103	0.531808	0	0.013362	0.142974	0	0	2.45193
TARA_076_MES_0.22.3	-35.3498	-21.0292	Meso	1.32913	0.0964922	0.0340561	0.00662202	0	0.150414	0.514625	0	0	0.172172	0.00851402	0	2.31203
TARA_068_MES_0.22.3	4.6802	-31.027	Meso	1.18554	0.0931829	0.0313685	0.0793438	0	0.173449	0.605227	0	0.00461301	0.0904151	0.00645822	0	2.2696
TARA_111_MES_0.22.3	-100.671	-16.9486	Meso	0.794168	0.088744	0.271665	0.0344109	0	0.0498053	0.888346	0	0.00814996	0.107761	0.00543331	0	2.24848
TARA_132_MES_0.22.3	-159.022	31.528	Meso	1.22936	0.0798162	0.0408815	0.0116804	0	0.142112	0.600568	0	0.00584021	0.115831	0	0	2.22609
TARA_037_MES_0.22.1.6	63.5851	20.8457	Meso	0.355353	0.13414	1.17549	0.0200033	0	0.0705999	0.171793	0	0	0.140023	0.115313	0	2.18271
TARA_112_MES_0.22.3	-129.599	-23.2232	Meso	1.2061	0.0926734	0.0376066	0	0	0.120878	0.494258	0	0	0.146397	0	0	2.09791
TARA_064_MES_0.22.3	37.9599	-29.5046	Meso	1.15498	0.0584363	0.0618737	0	0	0.113435	0.488115	0	0	0.18734	0.0103123	0	2.07449
TARA_065_MES_0.22.3	26.3048	-35.2421	Meso	1.07718	0.0726083	0.0579028	0.00459546	0	0.124997	0.503663	0	0.0128673	0.156246	0.00827183	0	2.01833
TARA_149_MES_0.22.3	-49.8233	34.0771	Meso	0.916805	0.0652742	0.11868	0.00890102	0	0.100878	0.605269	0	0.013846	0.173075	0.012857	0	2.01559
TARA_145_MES_0.22.3	-70.0343	39.2392	Meso	1.06323	0.0596204	0.0187694	0.0242898	0	0.121449	0.503461	0	0.00772857	0.0596204	0.00662449	0	1.86479
TARA_102_MES_0.22.3	-85.1545	-5.2529	Meso	0.752036	0.0735072	0.186595	0.0735072	0	0.0113088	0.610676	0	0	0.0697376	0	0	1.77737
MSP_11	-179.52	-25.49	Bathy	0.883978	0	0	0	0	0.662983	0	0	0	0.184162	0	0	1.73112
TARA_152_MES_0.22.3	-16.8714	43.7182	Meso	0.872435	0.0558358	0.0668036	0	0	0.0757772	0.429737	0	0.00897362	0.158534	0	0	1.6681
TARA_109_MES_0.22.3	-84.5766	1.9928	Meso	0.76889	0.0404679	0.223537	0.00963521	0	0.0317962	0.491396	0	0	0.0867169	0.0154163	0	1.66786
ERR3589584	-16.8345	54.5742	Meso	0.653509	0.154831	0.108583	0.0552969	0.0382052	0.130702	0.365965	0.005027	0.00703779	0.0341836	0.00603239	0	1.55937
TARA_142_MES_0.22.3	-88.45	25.6236	Meso	0.686246	0.06013	0.10308	0.00859	0	0.0706289	0.471496	0	0.00477222	0.125032	0.00668111	0	1.53666
TARA_133_MES_0.22.3	-127.727	35.2698	Meso	0.746224	0.0539749	0.0308428	0.0659693	0	0.0959553	0.470352	0	0	0.0462642	0	0	1.50958
TARA_085_MES_0.22.3	-49.5017	-61.9689	Meso	0.754002	0.044699	0.0235258	0.0682249	0	0.229377	0.296425	0	0.0152918	0.0129392	0	0	1.44448
RIS_02	174.463	-80.6577	NA	0.866863	0.0817795	0	0.294406	0	0	0.196271	0	0	0	0	0	1.43932
MSP_33	-33.41	-15.83	Bathy	0.558937	0	0.0869457	0	0	0.683145	0.0993665	0	0	0	0	0	1.42839
MSP_27	-11.8	-28.62	Bathy	0.570846	0	0	0	0	0.733945	0.101937	0	0	0	0	0	1.40673
TARA_110_MES_0.22.3	-84.6141	-1.8902	Meso	0.508703	0.0554949	0.297823	0.110065	0	0.0342219	0.333894	0	0	0.0443959	0.00554949	0	1.39015
TARA_125_MIX_0.22.3	-142.546	-8.8999	Epi	0.364661	0.0400412	0.197346	0	0	0.112973	0.400412	0	0.0100103	0.195916	0.034321	0.0114403	1.36712
MSP_37	-26	14.52	Bathy	0.340301	0	0	0	0	1.0209	0	0	0	0	0	0	1.36121
TARA_056_MES_0.22.3	43.2948	-15.3379	Meso	0.710627	0.0432363	0.0454535	0	0	0.076495	0.355868	0	0	0.11308	0.00665174	0	1.35141
TARA_122_MES_0.22.3	-139.239	-8.9729	Meso	0.627204	0.0483896	0.0623482	0	0	0.0558342	0.427132	0	0.0111668	0.101432	0.00651399	0	1.34002
RIS_01	174.463	-80.6577	NA	0.764396	0.101919	0	0.458638	0	0	0	0	0	0	0	0	1.32495
Polar_lib_33	111.08	84.6	Epi	0.711602	0.0855145	0.0213786	0.140488	0	0.106893	0.21684	0	0.0152704	0	0	0	1.29799
Polar_lib_14	-110	-67.02	Bathy	0.645001	0.17879	0.126737	0.196895	0	0.0611053	0.0678948	0	0	0	0.0113158	0	1.28774
ERR3589570	116.41	78.0391	Meso	0.768078	0.105301	0.0322097	0.174676	0.0173437	0.0384039	0.147421	0	0	0	0	0	1.28343
Polar_lib_51	-115.24	-69.94	Meso	0.82747	0.0581668	0.0131344	0.13885	0	0.0469087	0.180129	0	0	0	0	0	1.26466
MSP_3	-17.26	32.08	Bathy	0.373875	0.0817853	0.0701016	0	0	0.642598	0.0934689	0	0	0	0	0	1.26183
TARA_148b_MES_0.22.3	-56.9684	34.1504	Meso	0.388829	0.0433369	0.132418	0.0108342	0	0.122788	0.350307	0	0.0216685	0.157698	0.0288913	0	1.25677
MSP_34	-33.41	-15.83	Bathy	0.512462	0	0	0	0	0.675518	0	0	0	0	0	0	1.18798
Polar_lib_6	161.52	80	Meso	0.737551	0.1023	0.00990001	0.0924001	0	0.0577501	0.1782	0	0.00825001	0	0	0	1.18635
MSP_20	82.62	-29.81	Bathy	0.47619	0	0	0	0	0.529101	0.132275	0	0	0	0	0	1.13757
MSP_17	110.18	-31.16	Bathy	0.311284	0	0	0	0	0.622568	0.194553	0	0	0	0	0	1.1284
TARA_034_DCM_0.22.1.6	39.875	18.3967	Epi	0.360063	0.0417752	0.179037	0.0338181	0	0.0596789	0.145219	0	0.00994649	0.0716147	0.133283	0.0835505	1.11799
Polar_lib_36	169.45	52.76	Meso	0.630069	0.0552692	0	0.110538	0	0.0884308	0.185152	0	0.00967212	0.0124356	0	0	1.09157
MSP_43	-23.45	21.51	Bathy	0.478941	0	0	0	0	0.507114	0.0845189	0	0	0	0	0	1.07057
ERR3589585	0.2177	67.1675	Meso	0.534446	0.110033	0.012861	0.208634	0.012861	0.044299	0.134326	0.008574	0	0	0	0	1.06603
MSP_21	82.62	-29.81	Bathy	0.456447	0	0	0	0	0.608596	0	0	0	0	0	0	1.06504
Polar_lib_37	161.52	80	Meso	0.621927	0.0586109	0.0293055	0.0227931	0	0.0879164	0.2377	0	0	0	0	0	1.05825
ERR3589567	66.4827	79.2026	Epi	0.697991	0.0957007	0.0135229	0.132109	0.0145632	0.0249654	0.0655342	0	0	0	0	0	1.04439
Polar_lib_23	176.4	58.1	Meso	0.636005	0.0736117	0.0176668	0.108945	0	0.0618338	0.141334	0	0	0	0	0	1.0394
Polar_lib_15	-120	-68.01	Meso	0.425757	0.0905865	0.0317053	0.298936	0	0.0634106	0.105684	0	0	0	0	0	1.01608
Polar_lib_11	179.55	80.03	Bathy	0.514044	0.111105	0.0237023	0.29776	0	0.0177767	0.0355534	0	0	0	0	0	0.999941
Polar_lib_55	-46.99	56.33	Meso	0.670246	0.0517565	0.0129391	0.0828104	0	0.0362295	0.122922	0	0	0	0	0	0.976904
ERR3589593	1.3648	76.1246	Meso	0.539491	0.0769423	0.0161042	0.160147	0.0161042	0.027735	0.0706796	0.0581541	0	0	0	0	0.965358
TARA_070_MES_0.22.3	4.665	-31.0266	Meso	0.516424	0.0311872	0.0210972	0.00733817	0	0.0412772	0.281602	0	0	0.0623744	0	0	0.9613
RIS_07	174.463	-80.6577	NA	0.703138	0.0857486	0	0.171497	0	0	0	0	0	0	0	0	0.960384
MSP_19	150.41	-38.64	Bathy	0.383693	0	0	0	0	0.57554	0	0	0	0	0	0	0.959233
MSP_29	6.84	-31.81	Bathy	0.441968	0	0	0	0	0.403536	0.0960799	0	0	0	0	0	0.941583
MSP_4	-99.25	10.09	Bathy	0.337711	0	0	0	0	0.600375	0	0	0	0	0	0	0.938086
Polar_lib_34	111.08	84.6	Meso	0.498407	0.0899188	0.0205529	0	0	0.0333984	0.274895	0	0	0.0205529	0	0	0.937725
TARA_123_MIX_0.22.3	-140.285	-8.9109	Epi	0.344163	0.041521	0.205759	0.00645882	0	0.0544386	0.0950369	0	0.026758	0.071047	0.0535159	0.0313714	0.930069
Polar_lib_48	168.01	82.05	Bathy	0.594711	0.0544774	0	0.0885257	0	0.0703666	0.118034	0	0	0	0	0	0.926115
Polar_lib_52	-115.24	-69.94	Meso	0.577221	0.0383866	0.0127955	0.0255911	0	0.0597125	0.173451	0	0	0.015639	0	0	0.902797
RIS_04	174.463	-80.6577	NA	0.636803	0.0658762	0	0.17567	0	0	0	0	0	0	0	0	0.878349
Polar_lib_53	-115.24	-69.94	Bathy	0.356958	0.0610343	0.00924761	0.0665828	0	0.27188	0.110971	0	0	0	0	0	0.876674
Polar_lib_7	161.52	80	Meso	0.496764	0.0360428	0.00783539	0.059549	0	0.0752198	0.172379	0	0	0	0	0	0.84779
Polar_lib_56	168.01	82.05	Meso	0.504003	0.0361361	0	0.038038	0	0.0874874	0.161662	0	0	0.0133133	0	0	0.84064
MSP_35	-30.19	-9.12	Bathy	0.323939	0	0	0	0	0.404924	0.0809848	0	0	0	0	0	0.809848
MSP_8	-133.26	18.04	Bathy	0.334378	0	0	0	0	0.45977	0	0	0	0	0	0	0.794148
RIS_03	174.463	-80.6577	NA	0.647752	0	0	0.12955	0	0	0	0	0	0	0	0	0.777303
Polar_lib_47	168.01	82.05	Meso	0.438234	0.0227385	0.0206714	0.0227385	0	0.0992228	0.167438	0	0	0	0	0	0.771043
MSP_36	-30.19	-9.12	Bathy	0.295348	0	0	0	0	0.467635	0	0	0	0	0	0	0.762983
MSP_40	-26	7.33	Bathy	0.335787	0	0	0	0	0.361617	0	0	0	0	0	0	0.697404
ERR3589563	-55.9846	61.5754	Meso	0.382422	0.0847412	0.0651855	0.0890869	0.0228149	0.0141235	0.0336792	0	0	0	0	0	0.692053
MSP_10	-124.49	15.91	Bathy	0.215983	0	0	0	0	0.467963	0	0	0	0	0	0	0.683945
MSP_15	-27.33	-3.03	Bathy	0.273117	0	0	0	0	0.409676	0	0	0	0	0	0	0.682794
RIS_06	174.463	-80.6577	NA	0.519787	0.0590667	0	0.0945068	0	0	0	0	0	0	0	0	0.673361
MSP_14	-170.77	-5.74	Bathy	0.319721	0	0	0	0	0.348787	0	0	0	0	0	0	0.668507
TARA_072_MES_0.22.3	-17.9604	-8.7296	Meso	0.343311	0.0237791	0.0163481	0	0	0.0549892	0.166454	0	0	0.0520168	0	0	0.656897
Polar_lib_10	4.01	70.2	Meso	0.441443	0.024686	0	0.148116	0.0145212	0.0174254	0.0087127	0	0	0	0	0	0.654905
MSP_30	12.77	-32.81	Bathy	0.193288	0	0	0	0	0.351432	0.10543	0	0	0	0	0	0.650149
TARA_085_DCM_0.22.3	-49.2139	-62.2231	Epi	0.643594	0	0	0	0	0	0	0	0	0	0	0	0.643594
RIS_08	174.463	-80.6577	NA	0.545046	0	0	0.0961847	0	0	0	0	0	0	0	0	0.641231
Polar_lib_18	2.34	74.33	Meso	0.341648	0.0630224	0	0.165848	0	0.0265358	0.0431206	0	0	0	0	0	0.640175
TARA_025_DCM_0.22.1.6	19.3997	39.3991	Epi	0.183043	0.0433238	0.112642	0.0649857	0	0	0.00758166	0	0	0	0.0541548	0.174378	0.640109
MSP_7	-108.06	12	Bathy	0.252574	0	0	0	0	0.252574	0.116573	0	0	0	0	0	0.621721
RIS_09	174.463	-80.6577	NA	0.519931	0.0787774	0	0	0	0	0	0	0	0	0	0	0.598708
MSP_42	-23.45	21.51	Bathy	0.118413	0	0	0	0	0.473653	0	0	0	0	0	0	0.592066
MSP_39	-26	14.52	Bathy	0	0	0	0	0	0.587495	0	0	0	0	0	0	0.587495
MSP_24	63.25	-27.98	Bathy	0.221208	0	0	0	0	0.359464	0	0	0	0	0	0	0.580672
RIS_05	174.463	-80.6577	NA	0.365154	0	0	0.143453	0	0	0.0652061	0	0	0	0	0	0.573813
Polar_lib_29	4.01	70.2	Meso	0.139771	0.0902685	0.0145594	0.264982	0	0.0203832	0.0291189	0	0	0	0	0	0.559082
MSP_31	-36.95	-22.97	Bathy	0.288038	0	0	0	0	0.237208	0	0	0	0	0	0	0.525246
MSP_2	-17.26	32.08	Bathy	0.160815	0	0	0	0	0.348432	0	0	0	0	0	0	0.509247
TARA_032_DCM_0.22.1.6	37.245	23.4183	Epi	0.159753	0.0187944	0.0785949	0.0478403	0	0	0.014523	0	0.00768863	0.00512575	0.0871378	0.0777406	0.497198
MSP_23	92.99	-29.65	Bathy	0	0	0	0	0	0.487126	0	0	0	0	0	0	0.487126
ERR3589573	-85.6552	74.305	Meso	0.395766	0.0345699	0	0.0190731	0	0	0	0	0	0	0	0	0.449409
Polar_lib_12	179.55	80.03	Epi	0.217976	0	0	0.0351574	0	0.163482	0	0	0	0.0105472	0	0	0.427163
MSP_16	135.19	-39.23	Bathy	0.157233	0	0	0	0	0.269542	0	0	0	0	0	0	0.426774
ERR3589571	-168.814	73.3275	Epi	0.37922	0.0347127	0	0.00327478	0.00720452	0	0	0	0	0	0	0	0.424412
TARA_085_SRF_0.22.3	-49.529	-62.0385	Epi	0.414459	0	0	0	0	0	0	0	0	0	0	0	0.414459
TARA_145_SRF_0.22.3	-70.0377	39.2305	Epi	0.198381	0.0735719	0.0578065	0.0289033	0	0	0.0144516	0	0	0	0.0170792	0.0105103	0.400704
MSP_41	-26	7.33	Bathy	0.078064	0	0	0	0	0.263466	0.058548	0	0	0	0	0	0.400078
MSP_5	-52.63	20	Bathy	0.223499	0	0	0	0	0.175607	0	0	0	0	0	0	0.399106
MSP_38	-27.33	-3.03	Bathy	0.152033	0	0	0	0	0.22805	0	0	0	0	0	0	0.380084
ERR3589562	-52.996	64.7	Meso	0.315646	0.0213274	0.0117301	0.00853097	0.0149292	0	0	0	0	0	0	0	0.372163
Polar_lib_30	43.08	85.02	Meso	0.0667672	0.0519301	0	0.247286	0	0	0	0	0	0	0	0	0.365983
ERR3589578	76.2096	74.8283	Epi	0.261925	0.097766	0	0	0	0	0	0	0	0	0	0	0.359691
ERR3589560	-53.5127	70.9433	Meso	0.295979	0.0247546	0	0.0269072	0	0	0	0	0	0	0	0	0.347641
ERR3589583	-16.7943	54.5451	Epi	0.264789	0.0361076	0.0180538	0.00515823	0	0	0	0.0103165	0	0	0	0	0.334425
MSP_28	-21.43	-26.91	Bathy	0.328064	0	0	0	0	0	0	0	0	0	0	0	0.328064
TARA_146_SRF_0.22.3	-71.3093	34.6712	Epi	0.100469	0.0137003	0.0611945	0.0210071	0	0.00639345	0.0356207	0	0	0	0.0511476	0.0274005	0.316933
ERR3589575	-51.5086	69.1136	Epi	0.255452	0	0.0274551	0	0.023874	0	0	0	0	0	0	0	0.306781
Polar_lib_38	-121.22	70.21	Bathy	0.146343	0.02042	0.0272266	0	0	0.105503	0	0	0	0	0	0	0.299493
TARA_124_MIX_0.22.3	-140.597	-9.0714	Epi	0.0951935	0.0143546	0.0589293	0.0279536	0	0.00377752	0.00528853	0	0.00377752	0.00377752	0.0543963	0.0302202	0.297669
MSP_32	-36.95	-22.97	Bathy	0.10433	0	0	0	0	0.191271	0	0	0	0	0	0	0.295601
ERR3589574	-71.8814	72.4456	Meso	0.252041	0.0173469	0	0.0132653	0	0	0	0	0	0	0	0	0.282653
ERR3589579	91.6084	78.3555	Epi	0.251174	0.0238821	0	0.00494112	0	0	0	0	0	0	0	0	0.279997
TARA_152_MIX_0.22.3	-16.8794	43.7056	Epi	0.160862	0.0240369	0.0416023	0.0249614	0	0.00554698	0.00647147	0	0	0	0.0129429	0	0.276424
ERR3589561	-53.5989	70.9574	Epi	0.244217	0.00436102	0.0156997	0	0.00872205	0	0	0	0	0	0	0	0.273
Polar_lib_49	168.01	82.05	Epi	0.105159	0.0205483	0.0145047	0.00725233	0	0.11362	0.00966978	0	0	0	0	0	0.270754
TARA_023_DCM_0.22.1.6	17.7252	42.1735	Epi	0.0778987	0.0299611	0.019974	0.0159792	0	0	0	0	0	0	0.0319585	0.0878857	0.263657
ERR3589569	116.656	77.9668	Epi	0.235811	0.0213597	0	0	0	0	0	0	0	0	0	0	0.25717
TARA_067_SRF_0.22.3	17.9189	-34.9449	Epi	0.124486	0.132604	0	0	0	0	0	0	0	0	0	0	0.25709
ERR3589589	66.2954	79.3349	Epi	0.215243	0.0231253	0.00622604	0.0106732	0	0	0	0	0	0	0	0	0.255268
ERR3589576	-53.0106	64.7127	Epi	0.227969	0.00753615	0.0103622	0	0.00847817	0	0	0	0	0	0	0	0.254345
TARA_078_DCM_0.22.3	-35.1803	-20.9354	Epi	0.0818641	0.0232152	0.0586489	0.00610926	0	0	0.0342118	0	0	0.00855296	0.0305463	0.0109967	0.254145
MSP_25	63.25	-27.98	Bathy	0	0	0	0	0	0.252845	0	0	0	0	0	0	0.252845
MSP_18	103.31	-30.33	Bathy	0	0	0	0	0	0.251995	0	0	0	0	0	0	0.251995
TARA_009_DCM_0.22.1.6	5.9422	39.0609	Epi	0.131453	0.0608378	0.0217278	0.0141231	0	0	0	0	0	0	0.00543195	0.0130367	0.24661
TARA_068_SRF_0.22.3	4.6685	-31.0198	Epi	0.125953	0.0127547	0.0446414	0.0111604	0	0	0.00956602	0	0	0	0.0271037	0.014349	0.245528
TARA_068_DCM_0.22.3	17.7103	-32.2401	Epi	0.108125	0.0308928	0.028962	0.0424776	0	0	0	0	0	0	0.0328236	0	0.243281
TARA_025_SRF_0.22.1.6	19.3905	39.3888	Epi	0.0573412	0.0162725	0.0449431	0.0178223	0	0	0.00387441	0	0	0	0.019372	0.0829123	0.242538
ERR3589553	79.0604	78.9354	Epi	0.234742	0	0	0	0	0	0	0	0	0	0	0	0.234742
MSP_22	92.99	-29.65	Bathy	0.171422	0	0	0	0	0.061222	0	0	0	0	0	0	0.232644
TARA_004_DCM_0.22.1.6	-6.5669	36.5533	Epi	0.143477	0.0304346	0.0289853	0.00579706	0	0	0.00579706	0	0	0	0.00869559	0.00362316	0.22681
ERR3589582	-55.9869	61.5427	Epi	0.157001	0.00592458	0.027648	0.00691201	0.027648	0	0	0	0	0	0	0	0.225134
Polar_lib_57	-120	-68.01	Bathy	0.0950997	0	0	0	0	0.111249	0.00897167	0	0	0.00897167	0	0	0.224292
TARA_151_DCM_0.22.3	-28.9373	36.1811	Epi	0.112447	0.0092002	0.0388453	0.0092002	0	0.00817795	0.0337341	0	0	0.0102224	0	0	0.221827
TARA_152_SRF_0.22.3	-16.8344	43.6792	Epi	0.137616	0.0136478	0.0432182	0.0170598	0	0	0	0	0	0	0.00796124	0	0.219503
TARA_142_DCM_0.22.3	-88.4532	25.6168	Epi	0.08809	0.00524345	0.0230712	0.0241199	0	0	0.00943822	0	0	0	0.0346068	0.0241199	0.208689
TARA_066_DCM_0.22.3	26.2905	-35.1889	Epi	0.159597	0	0.0279994	0	0	0	0	0	0	0	0	0.0195996	0.207196
TARA_065_DCM_0.22.3	37.9889	-29.5019	Epi	0.059004	0.0104125	0.0437324	0.0277666	0	0.00347082	0.0208249	0	0	0	0.0270724	0.0111066	0.20339
Polar_lib_21	176.4	58.1	Bathy	0.137235	0	0	0.0162821	0	0.0255862	0.0209341	0	0	0	0	0	0.200037
MSP_12	-150.35	21.06	Bathy	0.0903342	0	0	0	0	0.108401	0	0	0	0	0	0	0.198735
Polar_lib_35	43.08	85.02	Bathy	0.0953319	0	0.0125025	0	0	0.0812665	0.00781409	0	0	0	0	0	0.196915
TARA_066_SRF_0.22.3	18.0459	-34.8901	Epi	0.13051	0.0186443	0.0233053	0.0124295	0	0	0	0	0	0	0.00932213	0	0.194211
ERR3589557	-154.91	71.8895	Epi	0.159144	0.02094	0.0108888	0	0	0	0	0	0	0	0	0	0.190972
TARA_030_DCM_0.22.1.6	32.8118	33.9235	Epi	0.0495156	0.0120443	0.0234195	0.0147208	0	0	0	0	0	0	0.0173974	0.067582	0.18468
TARA_142_SRF_0.22.3	-88.394	25.5264	Epi	0.084393	0.00959012	0.0258933	0.0115081	0	0	0	0	0	0	0.0306884	0.0182212	0.180294
ERR3589555	117.154	77.9028	Epi	0.149012	0.0252564	0	0	0	0	0	0	0	0	0	0	0.174269
Polar_lib_20	176.4	58.1	Meso	0.055227	0.0207101	0	0.0805394	0	0.0161079	0	0	0	0	0	0	0.172584
Polar_lib_46	12	78.95	Meso	0.157626	0	0	0.0111266	0	0	0	0	0	0	0	0	0.168753
Polar_lib_8	-120	-68.01	Bathy	0.0994736	0	0	0.0153036	0	0.0244858	0.0290769	0	0	0	0	0	0.16834
TARA_018_SRF_0.22.1.6	14.2574	35.759	Epi	0.0495744	0.0123936	0.0294348	0.00929519	0	0	0.0046476	0	0	0	0.0123936	0.0487998	0.166539
ERR3589591	-16.9377	54.5305	Epi	0.119083	0.026463	0.0132315	0.0044105	0	0	0	0	0	0	0	0	0.163188
TARA_149_SRF_0.22.3	-49.9181	34.1132	Epi	0.0522989	0.0177285	0.0292519	0.00975065	0	0	0.00620496	0	0	0	0.0274791	0.0150692	0.157783
ERR3589566	79.4201	78.9564	Epi	0.134353	0.0220676	0	0	0	0	0	0	0	0	0	0	0.15642
Polar_lib_5	2.34	74.33	Epi	0.155781	0	0	0	0	0	0	0	0	0	0	0	0.155781
MSP_9	-163.53	9.22	Bathy	0	0	0	0	0	0.146484	0	0	0	0	0	0	0.146484
TARA_038_DCM_0.22.1.6	64.5638	19.0351	Epi	0.0344274	0.00730277	0.0229516	0.0146055	0	0	0.00521627	0	0	0	0.0354706	0.0239948	0.143969
Polar_lib_32	111.08	84.6	Epi	0.139037	0	0	0	0	0	0	0	0	0	0	0	0.139037
TARA_148_SRF_0.22.3	-64.2489	31.6948	Epi	0.0412749	0.0044864	0.0260211	0.0134592	0	0	0	0	0	0	0.0296102	0.016151	0.131003
ERR3589577	66.3435	79.2233	Epi	0.107505	0.0194926	0	0	0	0	0	0	0	0	0	0	0.126997
TARA_082_DCM_0.22.3	-57.9446	-47.2007	Epi	0.125184	0	0	0	0	0	0	0	0	0	0	0	0.125184
ERR3589559	-71.892	72.4693	Epi	0.113325	0.0109891	0	0	0	0	0	0	0	0	0	0	0.124314
TARA_018_DCM_0.22.1.6	14.2765	35.7528	Epi	0.0350729	0.00989235	0.0179861	0.00899305	0	0	0	0	0	0	0.0125903	0.0368715	0.121406
Polar_lib_54	-120	-68.01	Epi	0.105901	0	0	0	0	0	0.0148633	0	0	0	0	0	0.120764
Polar_lib_16	-110	-67.02	Epi	0.0664894	0	0	0	0	0.0541765	0	0	0	0	0	0	0.120666
TARA_023_SRF_0.22.1.6	17.715	42.2038	Epi	0.0232183	0.00773944	0.0154789	0.00644953	0	0	0	0	0	0	0.0154789	0.0515963	0.119961
ERR3589587	44.0552	72.5199	Epi	0.105835	0.00612268	0.00699735	0	0	0	0	0	0	0	0	0	0.118955
ERR3589580	160.938	71.5955	Epi	0.0870486	0.0159589	0	0	0.00870486	0	0	0	0	0	0	0	0.111712
ERR3589572	-85.6208	74.3386	Epi	0.0893622	0.0148937	0	0.00521279	0	0	0	0	0	0	0	0	0.109469
TARA_007_DCM_0.22.1.6	1.9478	37.0541	Epi	0.0409043	0.0204521	0.0149982	0	0	0	0	0	0	0	0.00681738	0.0190887	0.102261
TARA_082_SRF_0.22.3	-58.2902	-47.1863	Epi	0.102125	0	0	0	0	0	0	0	0	0	0	0	0.102125
Polar_lib_27	-46.99	56.33	Bathy	0.0281477	0.0151564	0	0.0281477	0	0.0303129	0	0	0	0	0	0	0.101765
TARA_033_SRF_0.22.1.6	38.2517	21.9467	Epi	0.0407732	0	0.0211416	0.0105708	0	0	0	0	0	0	0.0211416	0.00755059	0.101178
Polar_lib_59	-169	-70.75	Epi	0.0989547	0	0	0	0	0	0	0	0	0	0	0	0.0989547
ERR3589592	0.2355	67.141	Epi	0.074473	0.00977929	0.00526577	0	0.00451352	0	0	0	0	0	0	0	0.0940316
Polar_lib_17	2.34	74.33	Epi	0.0713383	0	0	0	0	0	0.0203824	0	0	0	0	0	0.0917207
TARA_031_SRF_0.22.1.6	34.835	27.16	Epi	0.0207412	0.00414824	0.0207412	0.00663719	0	0	0	0	0	0	0.0107854	0.0273784	0.0904317
ERR3589586	1.3918	76.1825	Epi	0.0650864	0.0203136	0	0.00290194	0	0	0	0	0	0	0	0	0.0883019
TARA_004_SRF_0.22.1.6	-6.5669	36.5533	Epi	0.0260034	0	0.0146976	0.00904466	0	0	0	0	0	0	0.0124364	0.0248728	0.0870548
TARA_141_SRF_0.22.3	-80.0454	9.8481	Epi	0.0444876	0	0.0161773	0	0	0	0	0	0	0	0.00808865	0.0148292	0.0835827
TARA_009_SRF_0.22.1.6	5.916	39.1633	Epi	0.019057	0.00564653	0.0148221	0.00564653	0	0	0	0	0	0	0.0112931	0.026821	0.0832863
ERR3589558	-85.7806	74.2987	Epi	0.0638993	0.0162762	0	0.00301412	0	0	0	0	0	0	0	0	0.0831897
TARA_041_DCM_0.22.1.6	69.9776	14.6059	Epi	0.0310209	0.0070502	0.00846024	0	0	0	0	0	0	0	0.0183305	0.0112803	0.0761421
Polar_lib_22	4.01	70.2	Epi	0.0528681	0	0	0.0185038	0	0	0	0	0	0	0	0	0.0713719
TARA_042_DCM_0.22.1.6	73.9067	5.9998	Epi	0.0336997	0	0.0112332	0	0	0	0	0	0	0	0.0243386	0	0.0692715
TARA_065_SRF_0.22.3	26.2868	-35.1728	Epi	0.0474158	0	0	0.00878071	0	0	0	0	0	0	0.00878071	0	0.0649773
TARA_132_DCM_0.22.3	-159.046	31.5168	Epi	0.0588841	0	0.00525751	0	0	0	0	0	0	0	0	0	0.0641417
Polar_lib_60	-160.08	-70	Epi	0.0632893	0	0	0	0	0	0	0	0	0	0	0	0.0632893
TARA_064_DCM_0.22.3	37.9117	-29.5333	Epi	0.0311064	0	0.0155532	0.00324025	0	0	0.00324025	0	0	0	0.0051844	0.00324025	0.0615648
ERR3589590	73.2057	77.1604	Epi	0.0486607	0.0106445	0	0	0	0	0	0	0	0	0	0	0.0593052
Polar_lib_24	-151.19	75	Bathy	0.0581508	0	0	0	0	0	0	0	0	0	0	0	0.0581508
TARA_076_DCM_0.22.3	-17.9099	-8.7789	Epi	0.0320564	0	0.0256451	0	0	0	0	0	0	0	0	0	0.0577016
TARA_093_DCM_0.22.3	-73.0537	-33.9116	Epi	0.0286596	0.0270062	0	0	0	0	0	0	0	0	0	0	0.0556658
TARA_034_SRF_0.22.1.6	39.8567	18.4417	Epi	0.0261152	0	0.0097932	0.0097932	0	0	0	0	0	0	0	0.008161	0.0538626
TARA_032_SRF_0.22.1.6	37.2183	23.36	Epi	0.0133758	0	0.0158078	0	0	0	0	0	0	0	0.00851188	0.0158078	0.0535032
TARA_064_SRF_0.22.3	37.9889	-29.5019	Epi	0.0428957	0	0	0	0	0	0	0	0	0	0.00501379	0.00557088	0.0534804
TARA_122_DCM_0.22.3	-139.139	-9.0063	Epi	0.0239803	0.00570959	0.0171288	0	0	0	0	0	0	0	0.00570959	0	0.0525282
TARA_036_DCM_0.22.1.6	63.5047	20.8183	Epi	0.0102954	0	0.026768	0	0	0	0.00514769	0	0	0	0.0082363	0	0.0504473
Polar_lib_2	43.08	85.02	Epi	0.0489946	0	0	0	0	0	0	0	0	0	0	0	0.0489946
TARA_138_DCM_0.22.3	-102.954	6.3378	Epi	0.0485916	0	0	0	0	0	0	0	0	0	0	0	0.0485916
TARA_150_SRF_0.22.3	-37.3032	35.9346	Epi	0.0239675	0.00599187	0.0102718	0	0	0	0	0	0	0	0.00770383	0	0.0479349
ERR3589556	-168.133	73.3833	Epi	0.030247	0.0134431	0.00403294	0	0	0	0	0	0	0	0	0	0.0477231
ERR3589565	44.102	72.5432	Epi	0.0459819	0	0	0	0	0	0	0	0	0	0	0	0.0459819
TARA_133_DCM_0.22.3	-127.75	35.4002	Epi	0.0274151	0.0182767	0	0	0	0	0	0	0	0	0	0	0.0456918
TARA_007_SRF_0.22.1.6	1.9378	37.051	Epi	0.00704652	0	0.0112744	0.00704652	0	0	0	0	0	0	0.00704652	0.0112744	0.0436884
Polar_lib_19	-151.19	75	Epi	0.0430884	0	0	0	0	0	0	0	0	0	0	0	0.0430884
TARA_084_SRF_0.22.3	-60.6476	-60.2287	Epi	0.0411567	0	0	0	0	0	0	0	0	0	0	0	0.0411567
ERR3589564	0.3964	67.161	Epi	0.0301199	0.00903596	0	0	0	0	0	0	0	0	0	0	0.0391558
TARA_150_DCM_0.22.3	-37.1526	35.8427	Epi	0.0303778	0	0.00714771	0	0	0	0	0	0	0	0	0	0.0375255
ERR3589581	174.992	71.0704	Epi	0.0280263	0.0050047	0	0	0	0	0	0	0	0	0	0	0.033031
Polar_lib_1	179.55	80.03	Epi	0.031568	0	0	0	0	0	0	0	0	0	0	0	0.031568
TARA_124_SRF_0.22.3	-140.522	-9.1504	Epi	0.0115665	0	0.00433745	0	0	0	0	0	0	0	0.007952	0.00578327	0.0296393
TARA_039_DCM_0.22.1.6	66.3896	18.7341	Epi	0.0131585	0	0.00731026	0	0	0	0	0	0	0	0	0.00731026	0.027779
Polar_lib_50	-115.24	-69.94	Epi	0.0263995	0	0	0	0	0	0	0	0	0	0	0	0.0263995
Polar_lib_26	-110	-67.02	Meso	0.0253212	0	0	0	0	0	0	0	0	0	0	0	0.0253212
TARA_093_SRF_0.22.3	-73.1066	-34.0614	Epi	0.0126147	0.0126147	0	0	0	0	0	0	0	0	0	0	0.0252294
TARA_057_SRF_0.22.3	42.7401	-17.0248	Epi	0.0115452	0	0.00734692	0	0	0	0	0	0	0	0.00629736	0	0.0251894
TARA_128_SRF_0.22.3	-153.676	0.0003	Epi	0.0122796	0	0.0051165	0	0	0	0.0071631	0	0	0	0	0	0.0245592
TARA_072_DCM_0.22.3	-3.1759	-20.4091	Epi	0.0238855	0	0	0	0	0	0	0	0	0	0	0	0.0238855
ERR3589568	76.1478	74.8023	Epi	0.00842247	0.0121658	0	0	0	0	0	0	0	0	0	0	0.0205883
Polar_lib_44	125.22	-64.35	Epi	0.0200285	0	0	0	0	0	0	0	0	0	0	0	0.0200285
Polar_lib_13	-110	-67.02	Meso	0.0106775	0	0	0.00711837	0	0	0	0	0	0	0	0	0.0177959
TARA_098_SRF_0.22.3	-111.72	-25.8051	Epi	0	0	0.0071837	0	0	0	0	0	0	0	0.00862044	0	0.0158041
TARA_076_SRF_0.22.3	-35.1794	-20.9315	Epi	0	0	0	0.00695285	0	0	0	0	0	0	0	0.00834341	0.0152963
TARA_112_DCM_0.22.3	-129.5	-23.2189	Epi	0.0150767	0	0	0	0	0	0	0	0	0	0	0	0.0150767
TARA_078_SRF_0.22.3	-43.2899	-30.1367	Epi	0.00812557	0	0	0	0	0	0	0	0	0	0.00677131	0	0.0148969
TARA_098_DCM_0.22.3	-111.729	-25.826	Epi	0.0145535	0	0	0	0	0	0	0	0	0	0	0	0.0145535
TARA_030_SRF_0.22.1.6	32.898	33.9179	Epi	0	0	0.00764217	0	0	0	0	0	0	0	0	0.00655043	0.0141926
TARA_125_SRF_0.22.3	-142.557	-8.9111	Epi	0.00560471	0	0.00400336	0	0	0	0	0	0	0	0	0.00400336	0.0136114
Polar_lib_39	-159.86	74.99	Epi	0	0	0.0114956	0	0	0	0	0	0	0	0	0	0.0114956
TARA_123_SRF_0.22.3	-140.283	-8.9068	Epi	0.0113313	0	0	0	0	0	0	0	0	0	0	0	0.0113313
TARA_111_DCM_0.22.3	-100.675	-16.9587	Epi	0.0111928	0	0	0	0	0	0	0	0	0	0	0	0.0111928
Polar_lib_3	142.96	75.77	Epi	0.0105778	0	0	0	0	0	0	0	0	0	0	0	0.0105778
Polar_lib_4	-72.46	72.23	Epi	0.0103857	0	0	0	0	0	0	0	0	0	0	0	0.0103857
ERR3589588	44.0775	72.5128	Epi	0.0103068	0	0	0	0	0	0	0	0	0	0	0	0.0103068
TARA_102_DCM_0.22.3	-85.1678	-5.261	Epi	0.00933271	0	0	0	0	0	0	0	0	0	0	0	0.00933271
TARA_128_DCM_0.22.3	-153.686	0.0222	Epi	0.00695401	0	0	0	0	0	0	0	0	0	0	0	0.00695401
TARA_110_DCM_0.22.3	-84.6265	-1.9002	Epi	0.00649683	0	0	0	0	0	0	0	0	0	0	0	0.00649683
TARA_056_SRF_0.22.3	43.2965	-15.3424	Epi	0.00609731	0	0	0	0	0	0	0	0	0	0	0	0.00609731
TARA_151_SRF_0.22.3	-29.023	36.1715	Epi	0.00510717	0	0	0	0	0	0	0	0	0	0	0	0.00510717
Polar_lib_9	4.01	70.2	Meso	0.00491703	0	0	0	0	0	0	0	0	0	0	0	0.00491703
TARA_140_SRF_0.22.3	-79.3017	7.4122	Epi	0.00448177	0	0	0	0	0	0	0	0	0	0	0	0.00448177
ERR3589554	91.8557	78.2518	Epi	0	0	0	0	0	0	0	0	0	0	0	0	0
MSP_13	-170.77	-5.74	Bathy	0	0	0	0	0	0	0	0	0	0	0	0	0
MSP_26	39.89	-33.55	Bathy	0	0	0	0	0	0	0	0	0	0	0	0	0
MSP_6	-99.25	10.09	Bathy	0	0	0	0	0	0	0	0	0	0	0	0	0
Polar_lib_25	-46.99	56.33	Epi	0	0	0	0	0	0	0	0	0	0	0	0	0
Polar_lib_28	43.08	85.02	Epi	0	0	0	0	0	0	0	0	0	0	0	0	0
Polar_lib_31	2.34	74.33	Epi	0	0	0	0	0	0	0	0	0	0	0	0	0
Polar_lib_40	73.61	-60.01	Epi	0	0	0	0	0	0	0	0	0	0	0	0	0
Polar_lib_41	-176.62	-58.03	Epi	0	0	0	0	0	0	0	0	0	0	0	0	0
Polar_lib_42	-112.73	-70.05	Epi	0	0	0	0	0	0	0	0	0	0	0	0	0
Polar_lib_43	173.02	-76.96	Epi	0	0	0	0	0	0	0	0	0	0	0	0	0
Polar_lib_45	70.56	-66.58	Epi	0	0	0	0	0	0	0	0	0	0	0	0	0
Polar_lib_58	-89.29	-67.77	Epi	0	0	0	0	0	0	0	0	0	0	0	0	0
TARA_036_SRF_0.22.1.6	63.5133	20.8222	Epi	0	0	0	0	0	0	0	0	0	0	0	0	0
TARA_038_SRF_0.22.1.6	64.5126	19.0284	Epi	0	0	0	0	0	0	0	0	0	0	0	0	0
TARA_041_SRF_0.22.1.6	70.0128	14.5536	Epi	0	0	0	0	0	0	0	0	0	0	0	0	0
TARA_042_SRF_0.22.1.6	73.8955	6.0001	Epi	0	0	0	0	0	0	0	0	0	0	0	0	0
TARA_045_SRF_0.22.1.6	71.6428	0.0033	Epi	0	0	0	0	0	0	0	0	0	0	0	0	0
TARA_048_SRF_0.22.1.6	66.4228	-9.3921	Epi	0	0	0	0	0	0	0	0	0	0	0	0	0
TARA_052_DCM_0.22.1.6	53.9601	-16.9534	Epi	0	0	0	0	0	0	0	0	0	0	0	0	0
TARA_052_SRF_0.22.1.6	53.9801	-16.957	Epi	0	0	0	0	0	0	0	0	0	0	0	0	0
TARA_058_DCM_0.22.3	42.2866	-17.2855	Epi	0	0	0	0	0	0	0	0	0	0	0	0	0
TARA_062_SRF_0.22.3	40.3412	-22.3368	Epi	0	0	0	0	0	0	0	0	0	0	0	0	0
TARA_070_SRF_0.22.3	-3.1641	-20.4075	Epi	0	0	0	0	0	0	0	0	0	0	0	0	0
TARA_072_SRF_0.22.3	-17.9034	-8.7986	Epi	0	0	0	0	0	0	0	0	0	0	0	0	0
TARA_094_SRF_0.22.3	-87.0693	-32.7971	Epi	0	0	0	0	0	0	0	0	0	0	0	0	0
TARA_096_SRF_0.22.3	-101.16	-29.7238	Epi	0	0	0	0	0	0	0	0	0	0	0	0	0
TARA_099_SRF_0.22.3	-104.787	-21.146	Epi	0	0	0	0	0	0	0	0	0	0	0	0	0
TARA_100_DCM_0.22.3	-96.0122	-12.9723	Epi	0	0	0	0	0	0	0	0	0	0	0	0	0
TARA_100_SRF_0.22.3	-85.2732	-5.2669	Epi	0	0	0	0	0	0	0	0	0	0	0	0	0
TARA_102_SRF_0.22.3	-84.5546	2.0299	Epi	0	0	0	0	0	0	0	0	0	0	0	0	0
TARA_109_DCM_0.22.3	-84.5546	2.0649	Epi	0	0	0	0	0	0	0	0	0	0	0	0	0
TARA_109_SRF_0.22.3	-84.5766	1.9928	Epi	0	0	0	0	0	0	0	0	0	0	0	0	0
TARA_110_SRF_0.22.3	-84.589	-2.0133	Epi	0	0	0	0	0	0	0	0	0	0	0	0	0
TARA_111_SRF_0.22.3	-100.633	-16.9601	Epi	0	0	0	0	0	0	0	0	0	0	0	0	0
TARA_112_SRF_0.22.3	-129.395	-23.2811	Epi	0	0	0	0	0	0	0	0	0	0	0	0	0
TARA_122_SRF_0.22.3	-139.196	-8.9971	Epi	0	0	0	0	0	0	0	0	0	0	0	0	0
TARA_132_SRF_0.22.3	-158.996	31.5213	Epi	0	0	0	0	0	0	0	0	0	0	0	0	0
TARA_133_SRF_0.22.3	-127.742	35.3671	Epi	0	0	0	0	0	0	0	0	0	0	0	0	0
TARA_137_SRF_0.22.3	-116.626	14.2035	Epi	0	0	0	0	0	0	0	0	0	0	0	0	0
TARA_138_SRF_0.22.3	-102.943	6.3332	Epi	0	0	0	0	0	0	0	0	0	0	0	0	0
																0.525084	avg
																0.714275	sd
																19.1126
