# Supplementary material for: Novel bacterial group potentially dominates sulfur cycling in the dark ocean
Source: Research Square preprint supplement (doi:10.21203/rs.3.rs-1561045/v1), 2022-04-20
Supplement: Supplementary file 3 [file bbdc033eea4e13b895d70827.xlsx]

## Sheet: DIC
Suppl. Table 3. Contribution of UBA868 to total DIC fixation based on MICRO-CARD-FISH (see Material & Methods for details).
cruise	region	station	depth_m	WM	SUB	probe	sum.area_um2/FOVs	sum.UBA.area_um2/FOVs	Contribution of UBA868 to total DIC fix (%)
Archi4	TropAtlantic	St04	489	Meso	DIC	UBA10353	111.875	0	0
Archi4	TropAtlantic	St08	448	Meso	DIC	UBA10353	5.73559	0	0
Archi4	TropAtlantic	St08	995	Meso	DIC	UBA10353	4.97154	0.638451	12.8421
Archi4	TropAtlantic	St08	1976	Bathy	DIC	UBA10353	2.02002	0	0
Archi4	TropAtlantic	St13	976	Meso	DIC	UBA10353	3.68418	0	0
Archi4	TropAtlantic	St15	99	Epi	DIC	UBA10353	316.441	5.19134	1.64054
Archi4	TropAtlantic	St15	358	Meso	DIC	UBA10353	5.40067	0	0
Archi4	TropAtlantic	St15	936	Meso	DIC	UBA10353	3.68418	0	0
Archi4	TropAtlantic	St16	100	Epi	DIC	UBA10353	270.777	1.72696	0.63778
Archi4	TropAtlantic	St16	319	Meso	DIC	UBA10353	1.20364	0	0
Archi4	TropAtlantic	St16	967	Meso	DIC	UBA10353	0.941977	0	0
Archi4	TropAtlantic	St18	100	Epi	DIC	UBA10353	164.961	3.05619	1.85267
Archi4	TropAtlantic	St18	649	Meso	DIC	UBA10353	0.293059	0	0
Archi4	TropAtlantic	St18	975	Meso	DIC	UBA10353	0.26166	0	0
Archi4	TropAtlantic	St18	2746	Bathy	DIC	UBA10353	1.45483	0	0
Geo	NorthAtlantic	St06	250	Meso	DIC	UBA10353	424.319	3.03526	0.715325
Geo	NorthAtlantic	St06	400	Meso	DIC	UBA10353	75.9024	0.272127	0.358522
Geo	NorthAtlantic	St06	800	Meso	DIC	UBA10353	17.2696	0	0
Geo	NorthAtlantic	St06	2000	Bathy	DIC	UBA10353	699.857	12.4236	1.77517
SO248	Pacific	St10	200	Epi	DIC	UBA10353	494.601	0	0
SO248	Pacific	St10	300	Meso	DIC	UBA10353	12.5388	0	0
SO248	Pacific	St10	500	Meso	DIC	UBA10353	11.5235	0.0941977	0.817439
SO248	Pacific	St10	1000	Meso	DIC	UBA10353	38.0977	0	0
